# Supplementary material for: Thermosensitive Liposomes Encapsulating Nedaplatin and Picoplatin Demonstrate Enhanced Cytotoxicity against Breast Cancer Cells
Source: PubMed Central journal article supplement — ACS Omega. 2022 Nov 7;7(46):42115–25. doi: 10.1021/acsomega.2c04525 (PMC9686199; doi:10.1021/acsomega.2c04525), 2022-11-07
Supplement: ao2c04525_si_001.pdf [file ao2c04525_si_001.pdf]

## Supporting Information

### **Thermosensitive Liposomes Encapsulating Nedaplatin and Picoplatin Demonstrate Enhanced Cytotoxicity Against Breast Cancer Cells**

Sherif Ashraf Fahmy<sup>1,2</sup>, Eduard Preis<sup>3</sup>, Alice Abu Dayyih<sup>3</sup>, Mohamed Alawak<sup>3</sup>, Hassan Mohamed El-Said Azzazy<sup>1</sup>, Udo Bakowsky<sup>3,\*</sup>, Tamer Shoeib<sup>1\*</sup>

<sup>1</sup> Department of Chemistry, American University in Cairo (AUC), AUC Avenue, P.O. Box 74, New Cairo 11835, Egypt

<sup>2</sup> School of Life and Medical Sciences, University of Hertfordshire Hosted by Global Academic Foundation, R5 New Garden City, New Administrative Capital, AL109AB, Cairo 11835, Egypt

<sup>3</sup> Department of Pharmaceutics and Biopharmaceutics, University of Marburg, Robert-Koch-Str. 4, 35037 Marburg, Germany

\* Corresponding authors

Udo Bakowsky: [ubakowsky@aol.com](mailto:ubakowsky@aol.com)

Tamer Shoeib: [t.shoeib@aucegypt.edu](mailto:t.shoeib@aucegypt.edu)

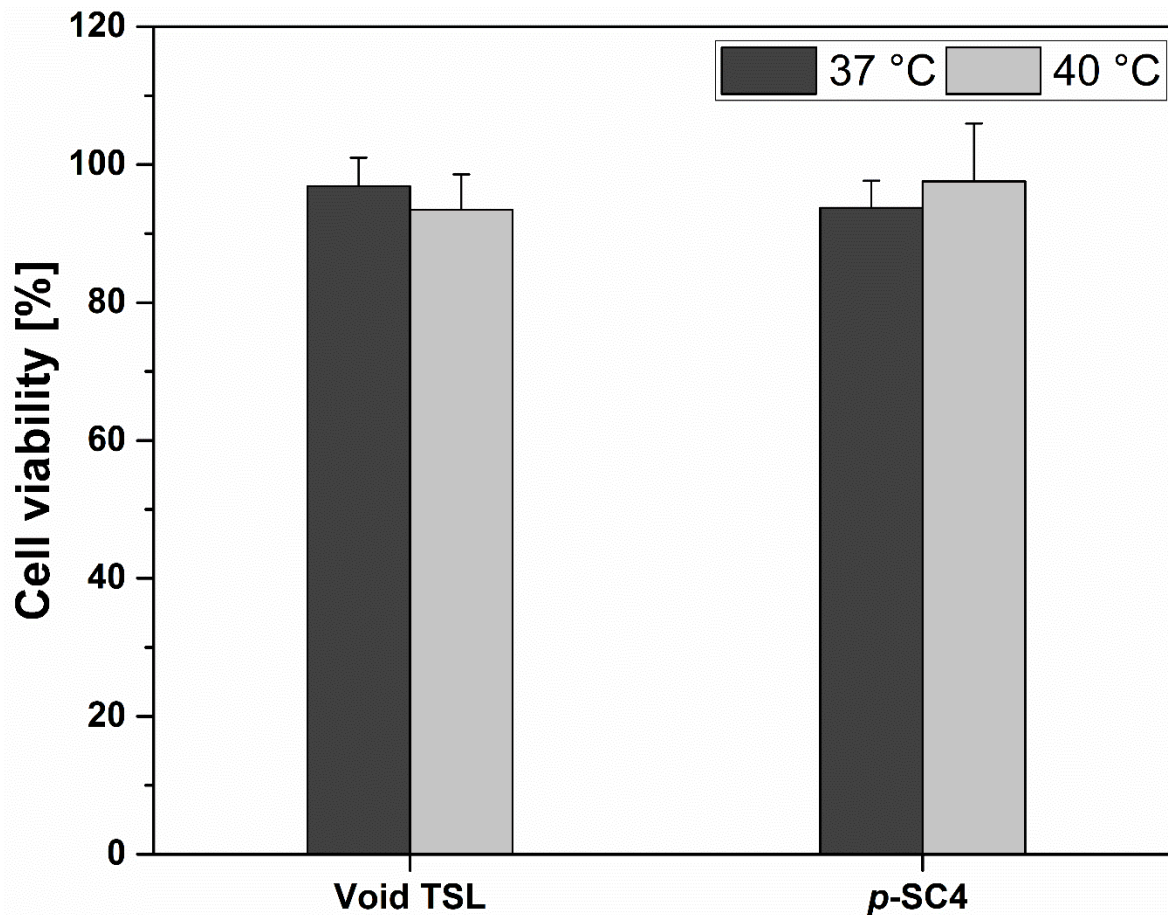

**Figure S1.** Average cell viability of MDA-MB-231 cells at 37 °C and 40 °C after treatment with void thermosensitive liposomes and *p*-SC4 for all runs for 24 h. All experiments were conducted in triplicates, the mean values of all experiments were calculated, and error bars represent the standard deviation.
